# Supplementary material
Source: MDPI journal article supplement (https://www.mdpi.com/2071-1050/15/21/15618)
Supplement: s1 [file s1]

## Supplementary Materials

# In Vitro Cytocompatibility Assessment of Novel 3D Chitin/Glucan- and Cellulose-Based Decellularized Scaffolds for Skin Tissue Engineering

Kannan Badri Narayanan <sup>1,2,\*</sup>, Rakesh Bhaskar <sup>1,2</sup>, Hyunjin Kim <sup>1</sup> and Sung Soo Han <sup>1,2,\*</sup>

<sup>1</sup> School of Chemical Engineering, Yeungnam University, 280 Daehak-Ro, Gyeongsan 38541, Gyeongbuk, Republic of Korea

<sup>2</sup> Research Institute of Cell Culture, Yeungnam University, 280 Daehak-Ro, Gyeongsan 38541, Gyeongbuk, Republic of Korea

\* Correspondence: okbadri@gmail.com or okbadri@yu.ac.kr (K.B.N.); sshan@yu.ac.kr (S.S.H.)

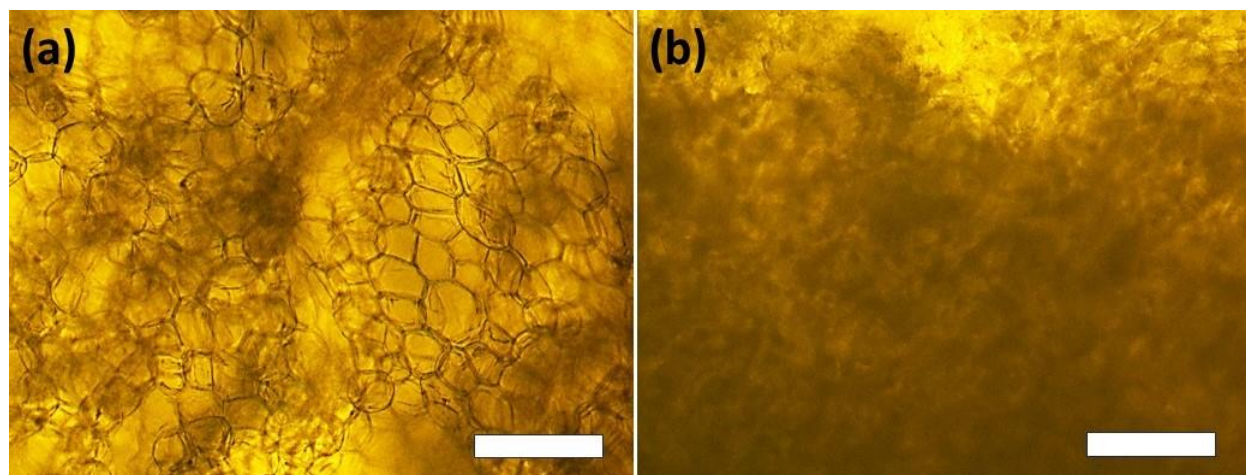

**Supplementary Figure S1.** Light microscopic images of (a) DUJF and (b) DMS (scale bar = 50  $\mu\text{m}$ ).

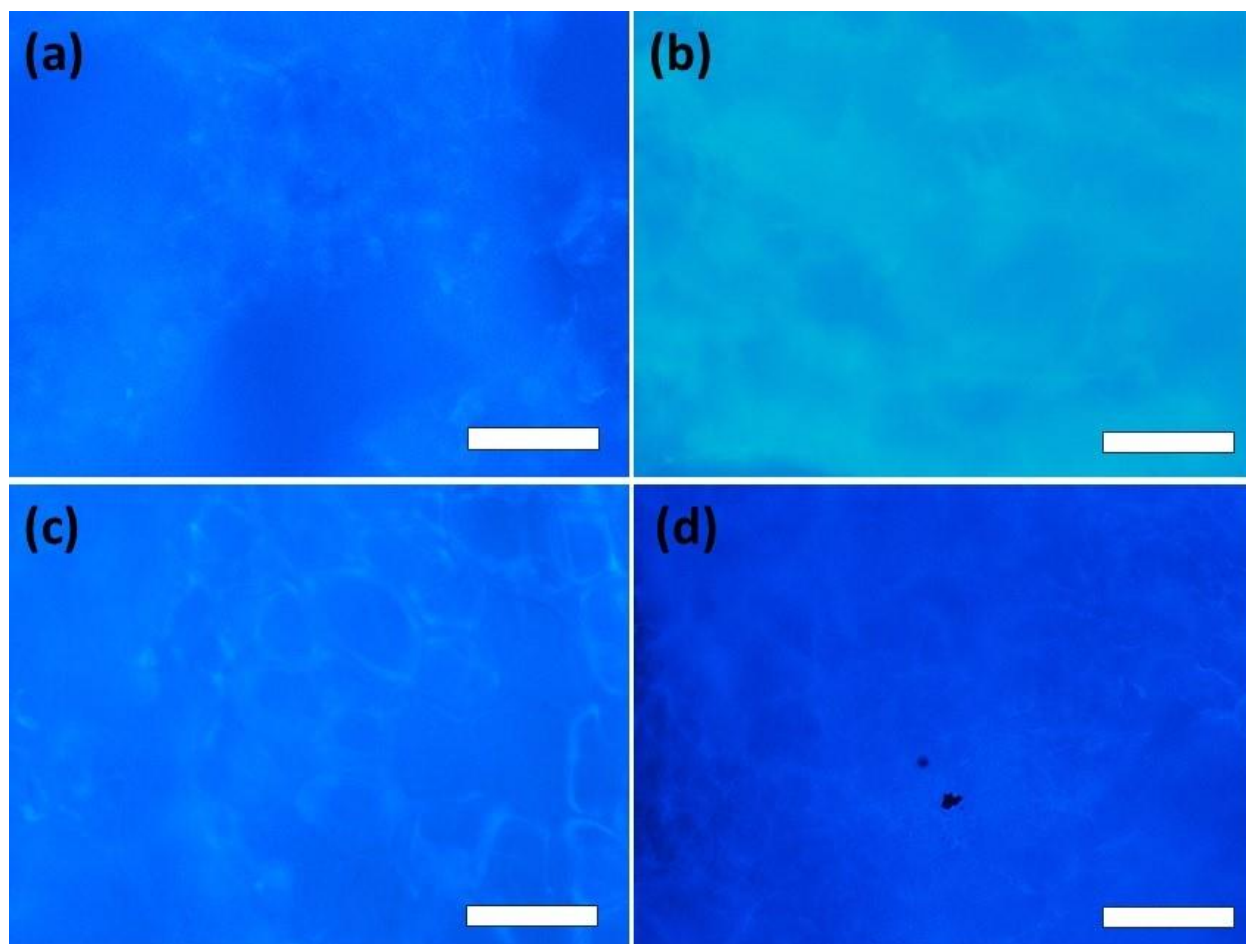

**Supplementary Figure S2.** DAPI staining of (a) native UJF (b) native MS, (c) DUJF and (d) DMS (scale bar = 50  $\mu\text{m}$ ).

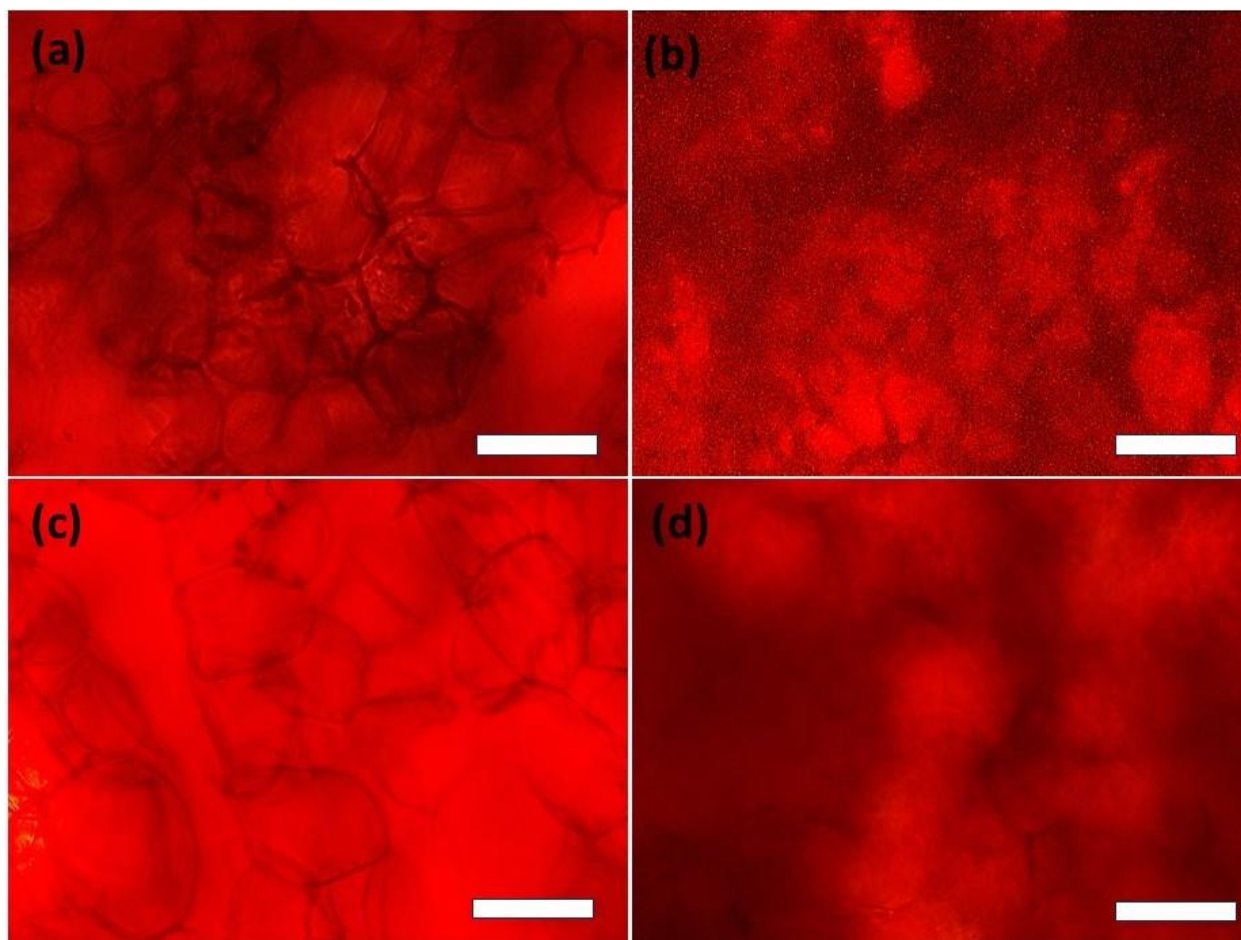

**Supplementary Figure S3.** H&E staining of (a) native UJF (b) native MS, (c) DUJF and (d) DMS (scale bar = 50  $\mu\text{m}$ ).
